# Supplementary material for: Gender Differences in the Predictive Value of Retinal Fractal Dimension for Cardiovascular and Cerebrovascular Diseases: A 10-Year Retrospective Cohort Study
Source: Research Square preprint supplement (doi:10.21203/rs.3.rs-8304682/v1), 2026-01-08
Supplement: Supplementary file 1 [file da01734f78af61e62f2831be.docx]

# Health Examination Questionnaire

## Basic Information

Age: ______ years

Sex: ☐ Male ☐ Female

Height: ______ cm

Weight: ______ kg

## Lifestyle Factors

Smoking status: ☐ Never ☐ Former ☐ Current

If current/former smoker, number of cigarettes per day: ______

Alcohol consumption: ☐ Never ☐ Occasional ☐ Regular

Physical activity frequency: ☐ Never ☐ 1–2 times/week ☐ ≥3 times/week

## Medical History

History of hypertension: ☐ Yes ☐ No

History of diabetes: ☐ Yes ☐ No

History of hyperlipidemia: ☐ Yes ☐ No

History of cardiovascular or cerebrovascular disease: ☐ Yes ☐ No

Other chronic diseases (please specify): ____________________________
